# Supplementary material
Source: HighWire-hosted journal article supplement (https://bmjopen.bmj.com/content/14/1/e081188)
Supplement: inline-supplementary-material-1 [file inline-supplementary-material-1.pdf]

**TITLE: Designing a Library of Lived Experience for Mental Health:  
integrated realist synthesis and experience-based co-design study**

**Supplemental file 1 – COREQ checklist**

| No. Item                                       | Guide questions/description                                                                                                                              | Reported on Page #                                                                                                                                                                                           |
|------------------------------------------------|----------------------------------------------------------------------------------------------------------------------------------------------------------|--------------------------------------------------------------------------------------------------------------------------------------------------------------------------------------------------------------|
| <b>Domain 1: Research team and reflexivity</b> |                                                                                                                                                          |                                                                                                                                                                                                              |
| <i>Personal Characteristics</i>                |                                                                                                                                                          |                                                                                                                                                                                                              |
| 1. Inter viewer/facilitator                    | Which author/s conducted the interview or focus group?                                                                                                   | Interviews were conducted by the lead author (PM) (page 5 line 19)                                                                                                                                           |
| 2. Credentials                                 | What were the researcher's credentials? E.g. PhD, MD                                                                                                     | PhD (corresponding author information)                                                                                                                                                                       |
| 3. Occupation                                  | What was their occupation at the time of the study?                                                                                                      | Research Associate (page 5 line 19)                                                                                                                                                                          |
| 4. Gender                                      | Was the researcher male or female?                                                                                                                       | Male (page 5 line 22)                                                                                                                                                                                        |
| 5. Experience and training                     | What experience or training did the researcher have?                                                                                                     | Doctoral training in qualitative methods (page 5 line 20)                                                                                                                                                    |
| <i>Relationship with participants</i>          |                                                                                                                                                          |                                                                                                                                                                                                              |
| 6. Relationship established                    | Was a relationship established prior to study commencement?                                                                                              | Interviewees were members of a study advisory group and co-authors and as such, there was an established relationship with the researcher conducting the interview (page 5 line 21-22).                      |
| 7. Participant knowledge of the interviewer    | What did the participants know about the researcher? e.g. personal goals, reasons for doing the research                                                 | Interviewees were fully informed of the nature of the study prior to participation, including the researcher's aims for the interview and research study more broadly (page 5 line 21-22)                    |
| 8. Interviewer characteristics                 | What characteristics were reported about the inter viewer/facilitator? e.g. Bias, assumptions, reasons and interests in the research topic               | The interviewer had no prior experience of living libraries in any capacity and bias was mitigated through feedback from an advisory group with diverse experiences of living libraries (page 5 lines 20-25) |
| Domain 2: study design                         |                                                                                                                                                          |                                                                                                                                                                                                              |
| <i>Theoretical framework</i>                   |                                                                                                                                                          |                                                                                                                                                                                                              |
| 9. Methodological orientation and Theory       | What methodological orientation was stated to underpin the study? e.g. grounded theory, discourse analysis, ethnography, phenomenology, content analysis | This study was underpinned by a realist methodological orientation (page 4, line 35)                                                                                                                         |
| <i>Participant selection</i>                   |                                                                                                                                                          |                                                                                                                                                                                                              |

**TITLE: Designing a Library of Lived Experience for Mental Health:  
integrated realist synthesis and experience-based co-design study**

|                                  |                                                                                    |                                                                                                                                                                                                           |
|----------------------------------|------------------------------------------------------------------------------------|-----------------------------------------------------------------------------------------------------------------------------------------------------------------------------------------------------------|
| 10. Sampling                     | How were participants selected? e.g. purposive, convenience, consecutive, snowball | Interviewees and workshop participants were purposively sampled based on their experience of living libraries (interviews, page 5, line 16) and mental health experiences (workshops, page 6, line 14-15) |
| 11. Method of approach           | How were participants approached? e.g. face-to-face, telephone, mail, email        | Digital study advertisements (page 6, line 12)                                                                                                                                                            |
| 12. Sample size                  | How many participants were in the study?                                           | 7 interviews (page 5, line 15) and 31 workshop participants (page 7, line 14)                                                                                                                             |
| 13. Non-participation            | How many people refused to participate or dropped out? Reasons?                    | Workshop retention is reported in Table 1 (page 8, line 22) – reasons for non-attendance were not recorded                                                                                                |
| <i>Setting</i>                   |                                                                                    |                                                                                                                                                                                                           |
| 14. Setting of data collection   | Where was the data collected? e.g. home, clinic, workplace                         | Data was collected online via video call. Page 5, line 19 (interviews), page 6, line 21 (workshops)                                                                                                       |
| 15. Presence of non-participants | Was anyone else present besides the participants and researchers?                  | No other people were present for interviews. Workshops included several co-facilitators described on page 6, lines 17-18 workshops).                                                                      |
| 16. Description of sample        | What are the important characteristics of the sample? e.g. demographic data, date  | Workshop demographics are provided in supplemental file 6. Interviewee demographic characteristics were not recorded.                                                                                     |
| <i>Data collection</i>           |                                                                                    |                                                                                                                                                                                                           |
| 17. Interview guide              | Were questions, prompts, guides provided by the authors? Was it pilot tested?      | Interview topic guide is provided in supplemental file 2.                                                                                                                                                 |
| 18. Repeat interviews            | Were repeat inter views carried out? If yes, how many?                             | No                                                                                                                                                                                                        |
| 19. Audio/visual recording       | Did the research use audio or visual recording to collect the data?                | Interviews were audio recorded (page 5, line 19). Workshops were not audio recorded in order to promote participants' feelings of safety in engaging with group discussions about mental health.          |
| 20. Field notes                  | Were field notes made during and/or after the interview or focus group?            | Researcher field notes were generated during co-design workshops (page 6 lines 29). Not applicable to interviews                                                                                          |

**TITLE: Designing a Library of Lived Experience for Mental Health:  
integrated realist synthesis and experience-based co-design study**

|                                    |                                                                                                                                 |                                                                                                                                                                                    |
|------------------------------------|---------------------------------------------------------------------------------------------------------------------------------|------------------------------------------------------------------------------------------------------------------------------------------------------------------------------------|
| 21. Duration                       | What was the duration of the interviews or focus group?                                                                         | Specific online call duration was not recorded.                                                                                                                                    |
| 22. Data saturation                | Was data saturation discussed?                                                                                                  | No – data saturation is typically not discussed in this form of analysis                                                                                                           |
| 23. Transcripts returned           | Were transcripts returned to participants for comment and/or correction?                                                        | No – however, analytic outputs were (page 6, lines 33-36)                                                                                                                          |
| Domain 3: analysis and findings    |                                                                                                                                 |                                                                                                                                                                                    |
| <i>Data analysis</i>               |                                                                                                                                 |                                                                                                                                                                                    |
| 24. Number of data coders          | How many data coders coded the data?                                                                                            | 3 – PM, FL, and RJ (Page 6, lines 5-6)                                                                                                                                             |
| 25. Description of the coding tree | Did authors provide a description of the coding tree?                                                                           | No                                                                                                                                                                                 |
| 26. Derivation of themes           | Were themes identified in advance or derived from the data?                                                                     | From the data (page 5, lines 3-5)                                                                                                                                                  |
| 27. Software                       | What software, if applicable, was used to manage the data?                                                                      | NVivo 12 (page 6, line 31)                                                                                                                                                         |
| 28. Participant checking           | Did participants provide feedback on the findings?                                                                              | Yes – written and verbal feedback from an advisory group (page 56, lines 33-36)                                                                                                    |
| <i>Reporting</i>                   |                                                                                                                                 |                                                                                                                                                                                    |
| 29. Quotations presented           | Were participant quotations presented to illustrate the themes/findings? Was each quotation identified? e.g. participant number | No – however, deidentified workshop data were used to illustrate findings                                                                                                          |
| 30. Data and findings consistent   | Was there consistency between the data presented and the findings?                                                              | In order to demonstrate this consistency, findings are presented with reference to extracts of underlying data from relevant literature and workshops (Table 2 – page 11, line 11) |
| 31. Clarity of major themes        | Were major themes clearly presented in the findings?                                                                            | A detailed description of each major theme, or context-mechanism-outcome configuration (CMO), is presented (page 8 line 8 – page 11 line 9)                                        |
| 32. Clarity of minor themes        | Is there a description of diverse cases or discussion of minor themes?                                                          | Not applicable to all themes, however, diverse experiences of safety and potential harms are described in CMO 1 (page 8 line 10 – page 9 line 10)                                  |

**TITLE: Designing a Library of Lived Experience for Mental Health:  
integrated realist synthesis and experience-based co-design study**

Adapted from: Tong, A., Sainsbury, P., & Craig, J. (2007). Consolidated criteria for reporting qualitative research (COREQ): a 32-item checklist for interviews and focus groups. *International journal for quality in health care*, 19(6), 349-357.
