# Supplementary material
Source: HighWire-hosted journal article supplement (https://bmjopen.bmj.com/content/14/1/e081188)
Supplement: inline-supplementary-material-6 [file inline-supplementary-material-6.pdf]

## TITLE: Designing a Library of Lived Experience for Mental Health: integrated realist synthesis and experience-based co-design study

### Supplemental file 6 – Participant demographics

| ID | Age group | Gender identity | Ethnic group                          | Current or previous mental health experience                                             |
|----|-----------|-----------------|---------------------------------------|------------------------------------------------------------------------------------------|
| 1  | 51-60     | Female          | White/White British                   | Carer; voluntary sector staff                                                            |
| 2  | 31-40     | Male            | Black/African/Caribbean/Black British | Mental health service user                                                               |
| 3  | 51-60     | Female          | White/White British                   | Mental health service user; carer; voluntary sector service user; voluntary sector staff |
| 4  | 41-50     | Male            | White/White British                   | Mental health service user; mental health service staff; carer; voluntary sector staff   |
| 5  | 61-70     | Male            | White/White British                   | Mental health service user; voluntary sector staff                                       |
| 6  | 18-30     | Female          | Asian/Asian British                   | Mental health service user; carer; voluntary sector service user                         |
| 7  | 51-60     | Male            | White/White British                   | Mental health service user                                                               |
| 8  | 41-50     | Male            | White/White British                   | Mental health service staff                                                              |
| 9  | 31-40     | Female          | White/White British                   | Mental health service user; mental health service staff                                  |
| 10 | 18-30     | Female          | White/White British                   | Carer; voluntary sector staff                                                            |
| 11 | 51-60     | Male            | White/White British                   | Mental health service user; mental health service staff; carer                           |
| 12 | 71-80     | Male            | White/White British                   | Mental health service user                                                               |
| 13 | 41-50     | Male            | White/White British                   | Mental health service user; mental health service staff                                  |
| 14 | 31-40     | Female          | Other ethnic group                    | Voluntary sector service user                                                            |
| 15 | 41-50     | Male            | White/White British                   | Mental health service user                                                               |
| 16 | 51-60     | Male            | White/White British                   | Carer; voluntary sector staff                                                            |
| 17 | 31-40     | Female          | White/White British                   | Mental health service user; carer; mental health service staff                           |
| 18 | 18-30     | Male            | Black/African/Caribbean/Black British | Mental health service user                                                               |
| 19 | 31-40     | Female          | White/White British                   | Mental health service user; mental health service staff; carer                           |
| 20 | 31-40     | Male            | White/White British                   | Mental health service user; voluntary sector staff                                       |
| 21 | 41-50     | Female          | Asian/Asian British                   | Carer                                                                                    |
| 22 | 61-70     | Male            | White/White British                   | Mental health service user; voluntary sector staff                                       |
| 23 | 41-50     | Female          | White/White British                   | Carer                                                                                    |
| 24 | 41-50     | Female          | Mixed/multiple ethnic groups          | Mental health service user                                                               |
| 25 | 61-70     | Female          | White/White British                   | Mental health service user; voluntary sector service user                                |
| 26 | 41-50     | Male            | White/White British                   | Mental health service user                                                               |
| 27 | 51-60     | Female          | White/White British                   | Mental health service user; carer; voluntary sector service user                         |
| 28 | 18-30     | Female          | White/White British                   | Mental health service user                                                               |
| 29 | 31-40     | Male            | Other ethnic group                    | Mental health service user; voluntary sector service user                                |
| 30 | 51-60     | Female          | Other ethnic group                    | Mental health service user                                                               |

**TITLE: Designing a Library of Lived Experience for Mental Health: integrated realist synthesis and experience-based co-design study**

31 51-60 Female White/White British Mental health service staff; carer

---
